# Supplementary material for: Investigation into the Exciton Binding Energy of Carbon Nitrides on Band Structure and Carrier Concentration through the Photoluminescence Effect
Source: MDPI journal article supplement (doi:10.3390/catal14040262), 2024-04-15
Supplement: s1 [file s1]

# **Supplementary Materials**

## **Investigation into the Exciton Binding Energy of Carbon Nitrides on Band Structure and Carrier Concentration through the Photoluminescence Effect**

**Zhiyou Lin <sup>1</sup>, Xu Cai <sup>1</sup> and Wei Lin <sup>1,2,\*</sup>**

<sup>1</sup> State Key Laboratory of Photocatalysis on Energy and Environment, College of Chemistry, Fuzhou University, Fuzhou 350108, China; scp15880070733@163.com (Z.L.)

<sup>2</sup> Fujian Provincial Key Laboratory of Theoretical and Computational Chemistry, Xiamen University, Xiamen 361005, China

\* Correspondence: wlin@fzu.edu.cn

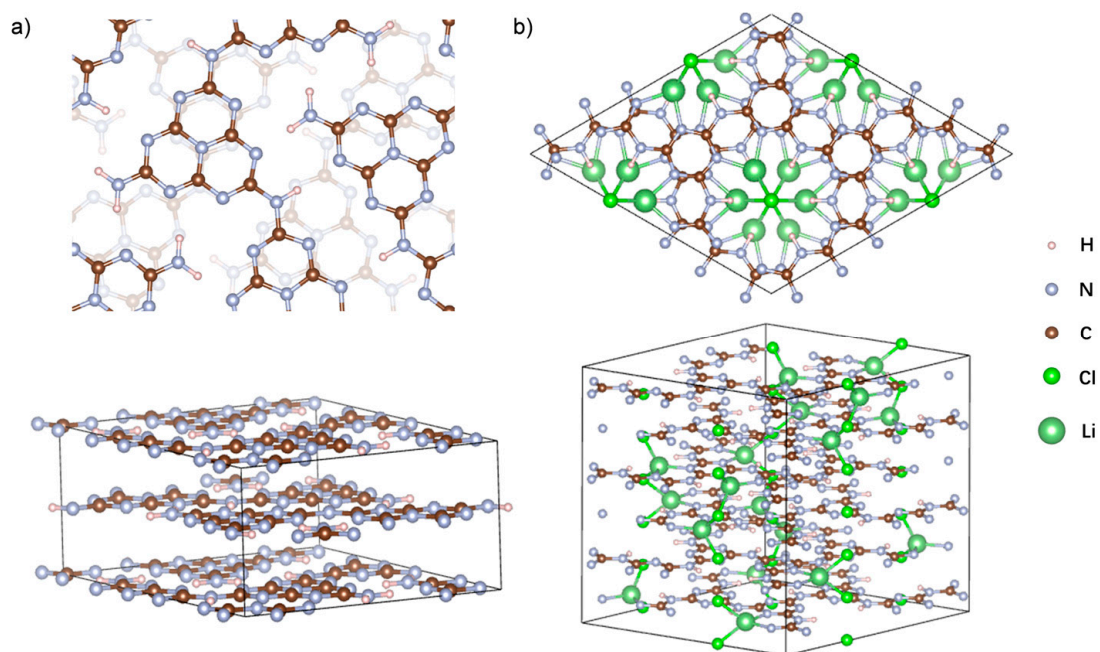

Figure S1. Structural basis applied for computation, a) ab stacking structure of melon b) the complete equal distribution of Li ions in each possible occupation site in the six-layer PTI/Li<sup>+</sup>Cl<sup>-</sup> mode.

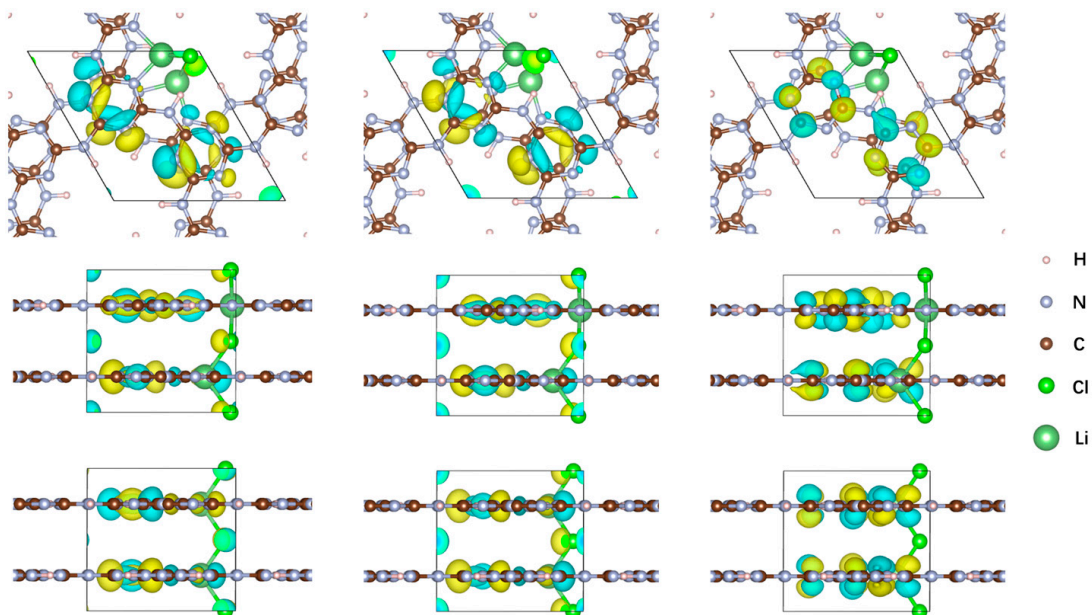

Figure S2. Representative band state at high symmetry point G, from left to right: band no. 81, band no.82, band no. 83.

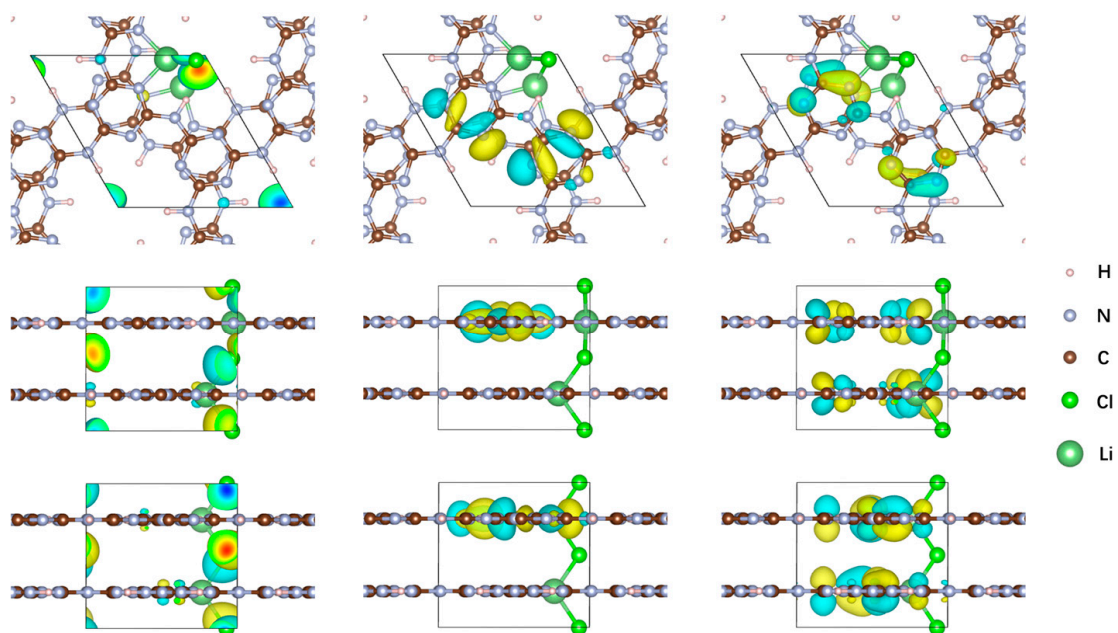

Figure S3. Representative band state at high symmetry point K, from left to right: band no. 81, band no.82, band no. 83.

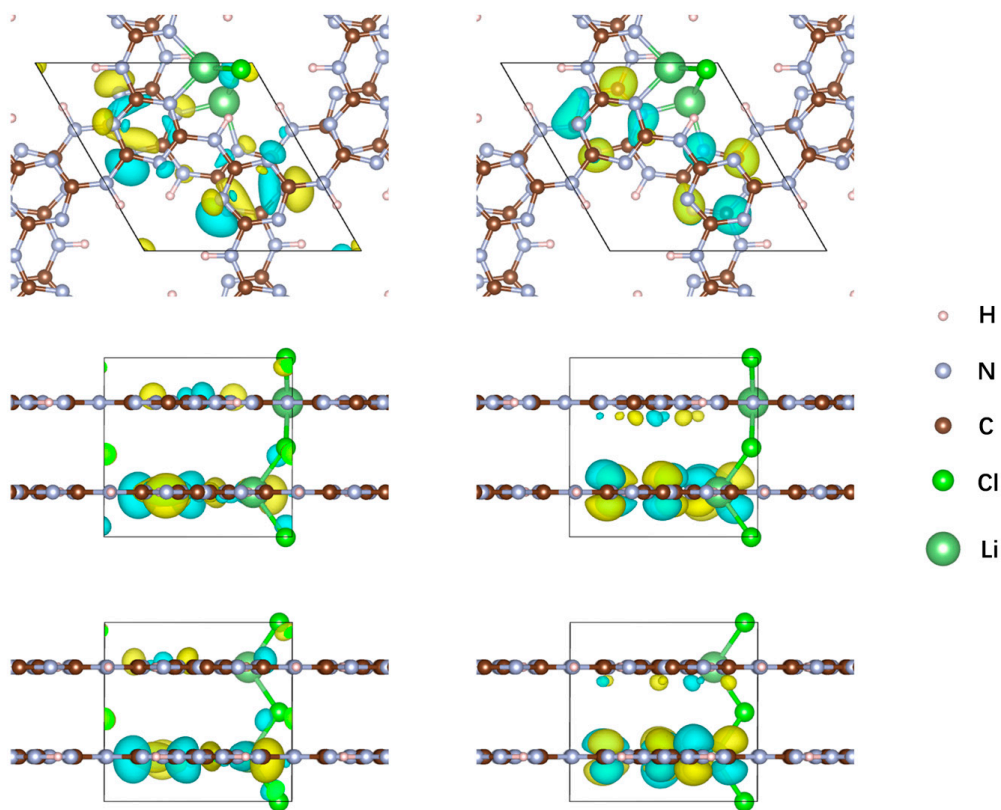

Figure S4. Representative band state at high symmetry point A, from left to right: band no. 82, band no.83

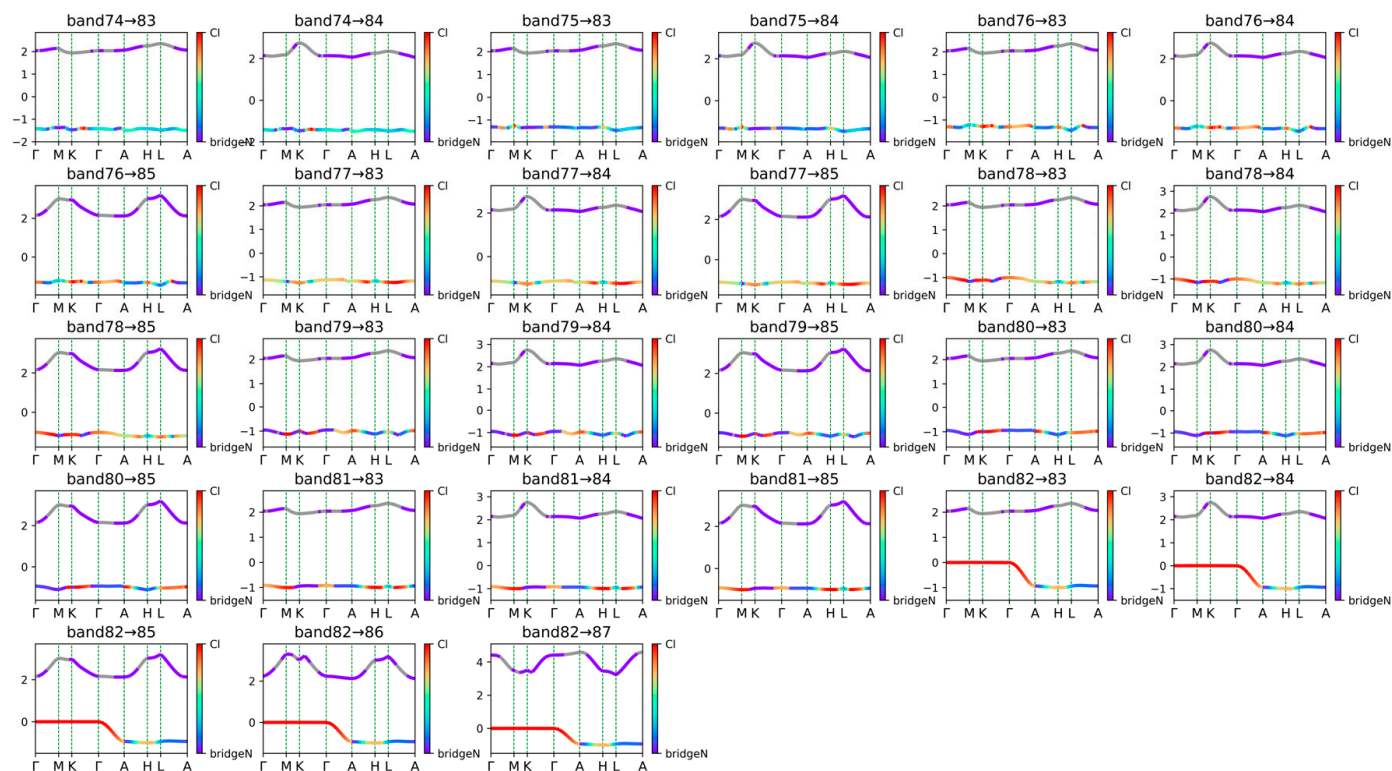

Figure S5. Contribution of p orbitals of bridging N in each band, to confirm if the transition is concerned with the lone electron pairs.

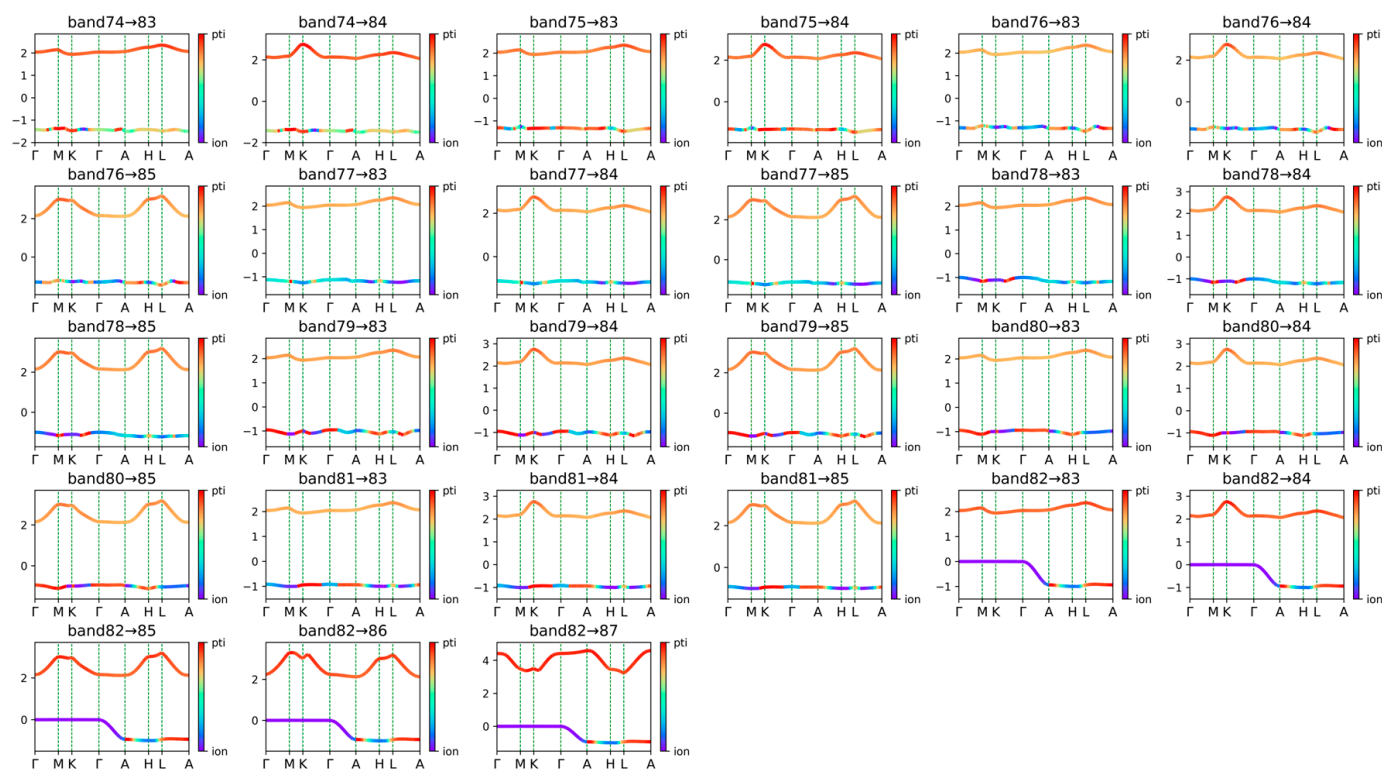

Figure S6. Relative compose of organic skeletons and ions in each band.



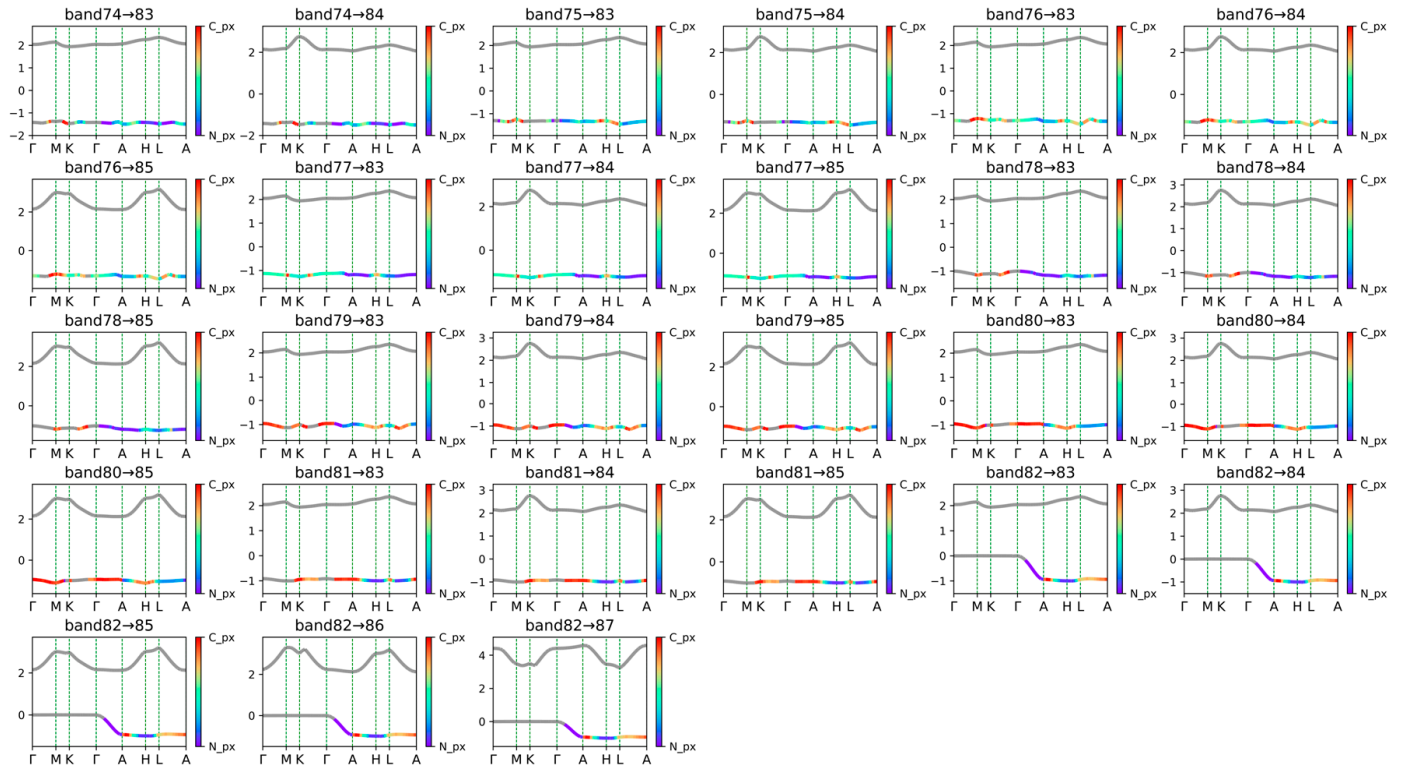

Figure S7. Contribution of  $p_x$  orbitals in each band, so that whether the excitation is involved with  $\pi$ -orbitals is ensured.

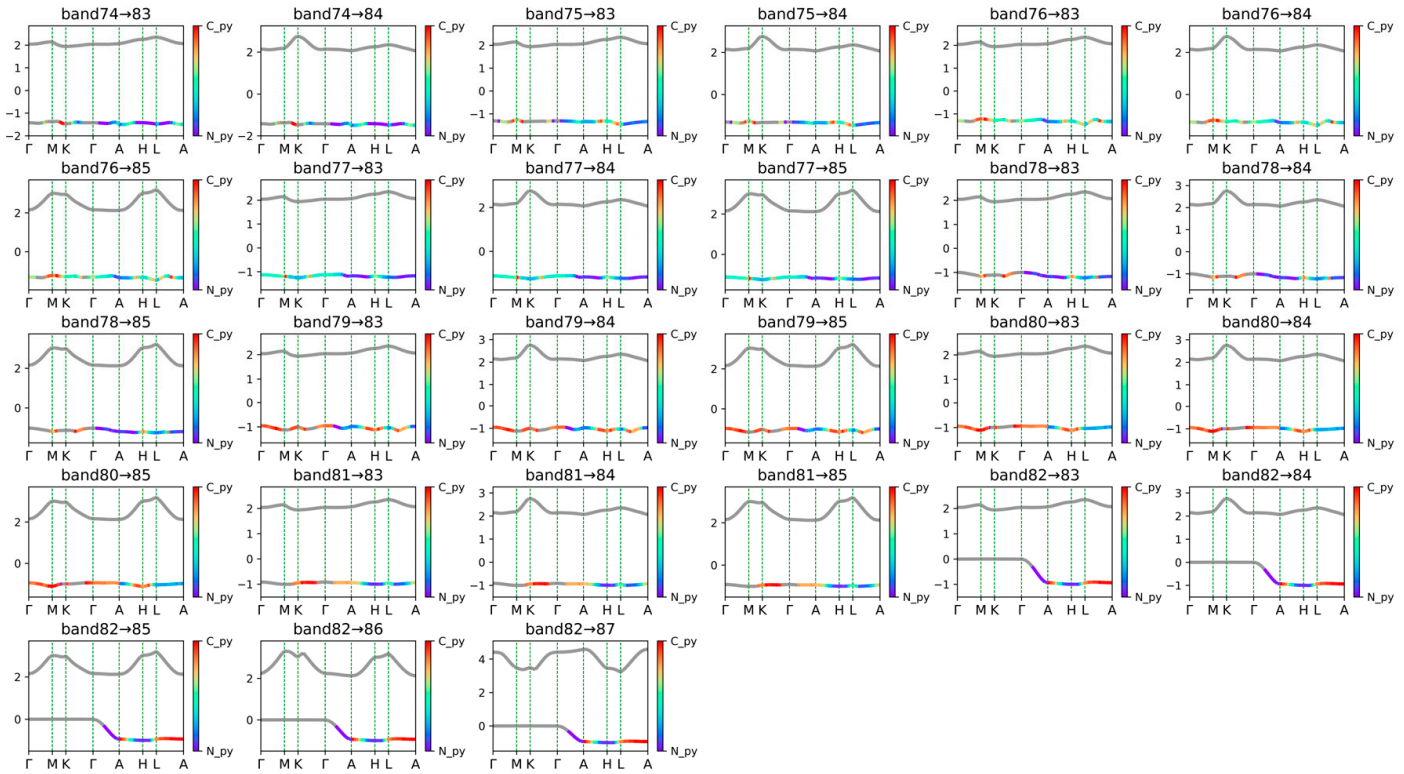

Figure S8. Contribution of  $p_y$  orbitals in each band, so that whether the excitation is involved with  $\pi$ -orbitals is ensured.

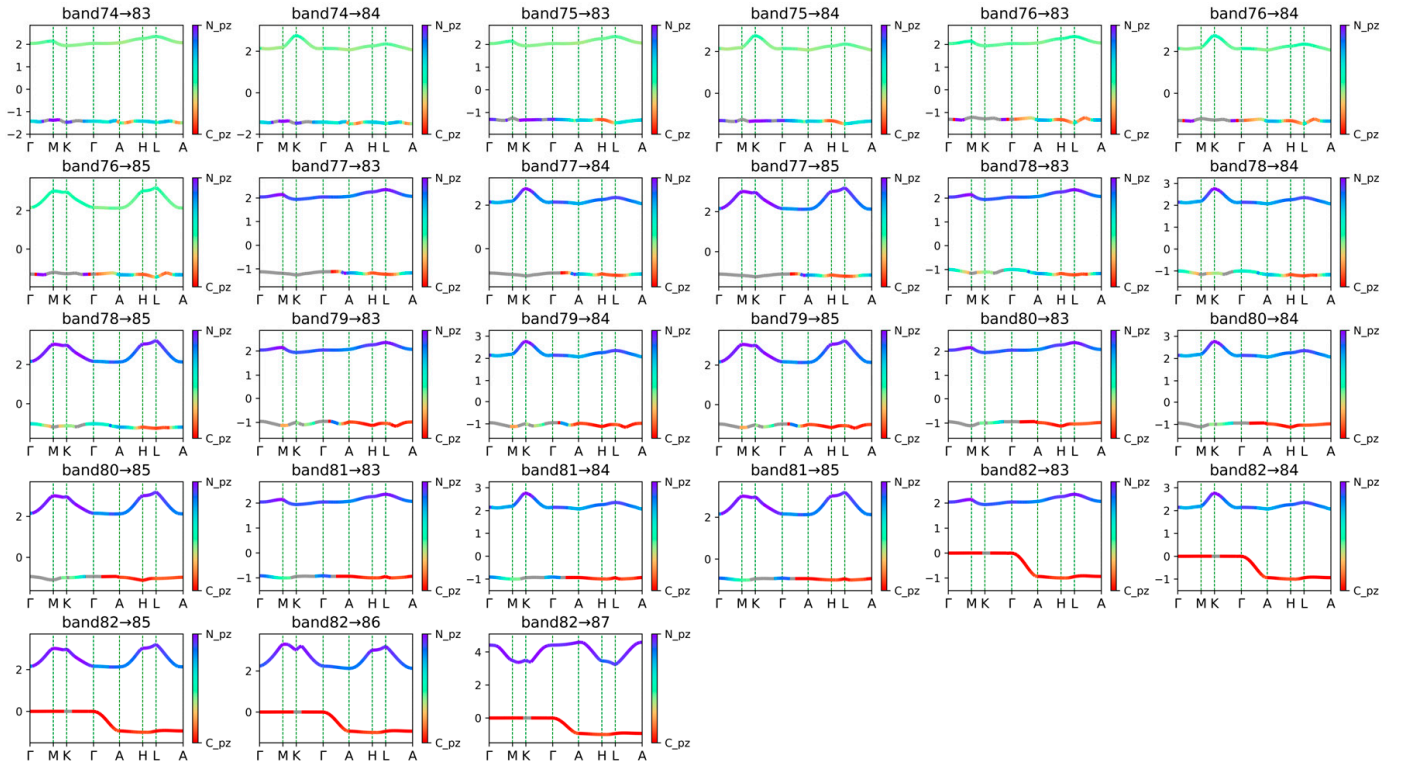

Figure S9. Contribution of  $p_z$  orbitals in each band, so that whether the excitation is involved with  $\pi$ -orbitals is ensured.

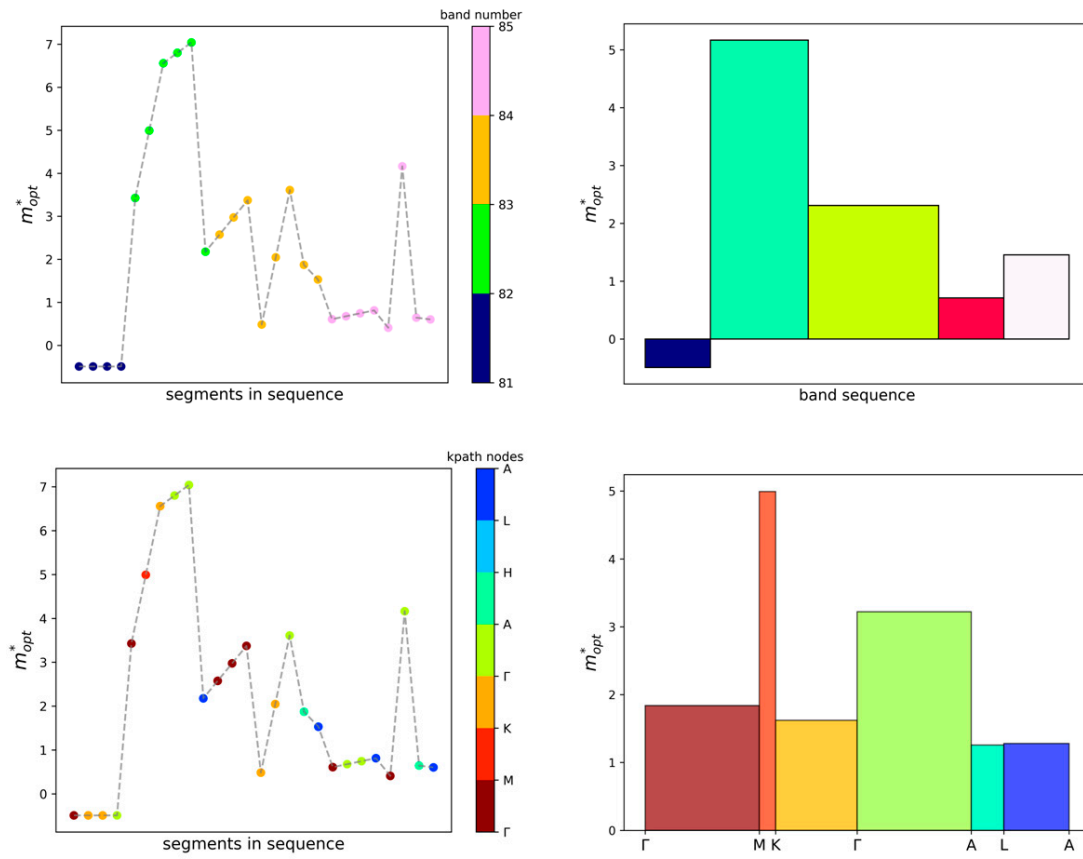

Figure S10. Optical effective mass of PTI/Li<sup>+</sup>Cl<sup>-</sup> calculated by Kane-dispersion, averaged by band number (upper) and k-points (lower), respectively. Segment in sequence is basically band segments separated by high symmetry K-points. As listed in Table S1, band sequence of horizontal axis included the band number from Band 82 is the ionic band of Li, has a relatively large effective mass.

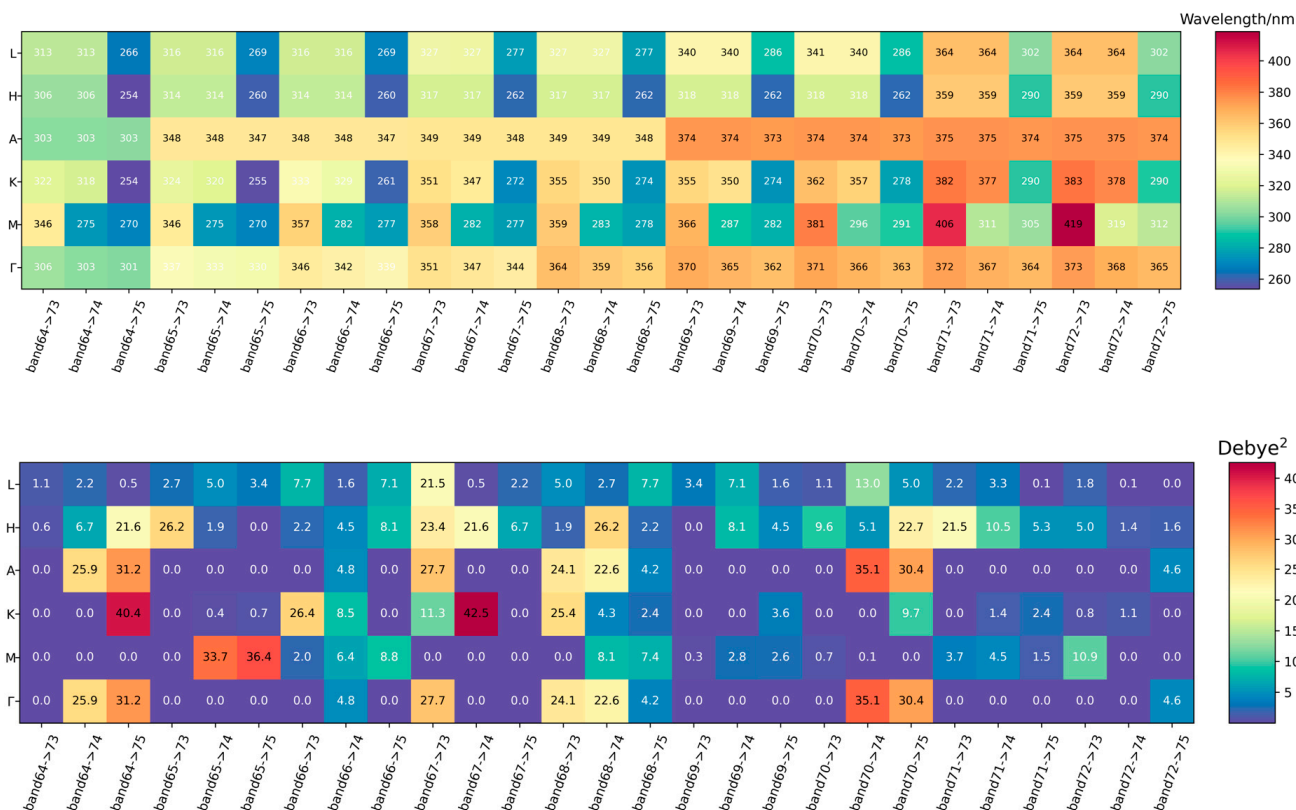

Figure S11. Screen matrix for binding energy and exciton radii

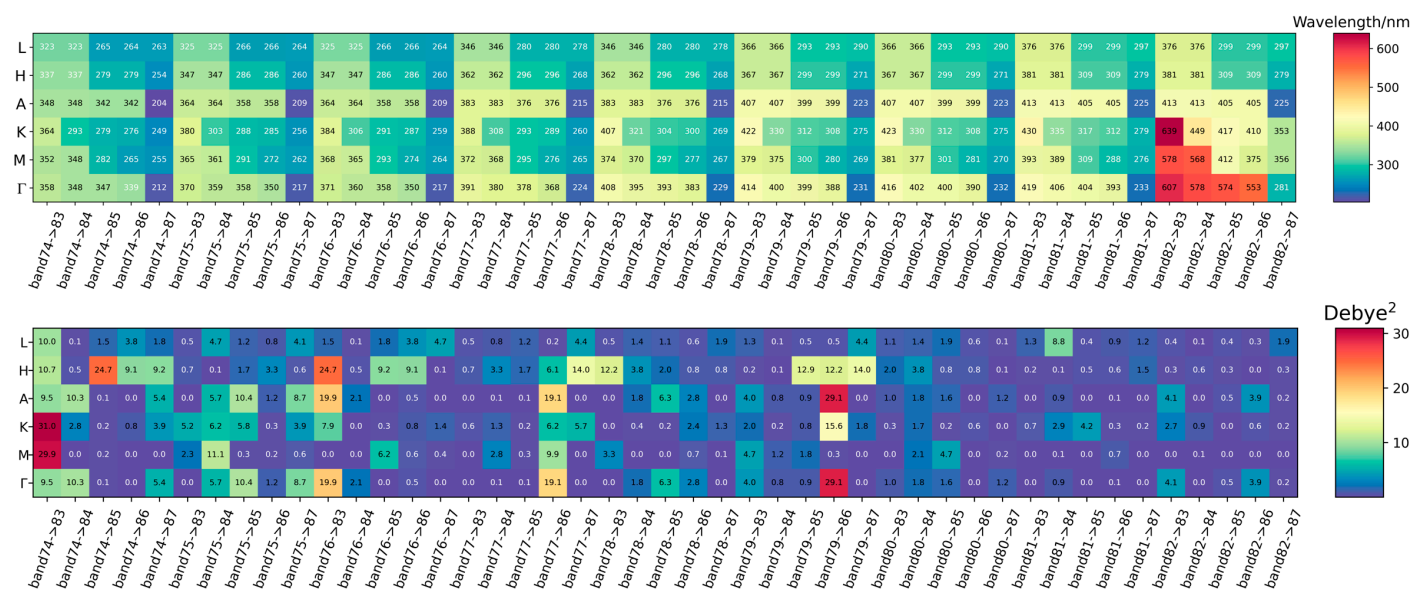

Figure S12. Screen matrix for binding energy and exciton radii, transition dipole moment matrix
